# Supplementary material for: Impact of the Gut Microbiota on Atorvastatin Mediated Effects on Blood Lipids
Source: PubMed Central journal article supplement (PMC7290826; doi:10.3390/jcm9051596), 2020-05-25
Supplement: jcm-09-01596-s001.pdf [file jcm-09-01596-s001.pdf]

**Supplemental Table S1:** qPCR primers for 16S rRNA analysis<sup>a</sup>

| Target                                      | Reference strain                           | Primer Sequence (5' to 3') <sup>b</sup> and Reference              |
|---------------------------------------------|--------------------------------------------|--------------------------------------------------------------------|
| <i>Total Eubacterial load</i>               | <i>Escherichia coli</i> ATCC 25922         | F: CGGYCCAGACTCCTACGGG<br>R: TTACCGCGGCTGCTGGCAC<br>Ref.: [1]      |
| <i>Clostridium Cluster IV</i>               | <i>Clostridium leptum</i> DSMZ 753         | F: TTACTGGGTGTAAAGGG<br>R: TAGAGTGCTCTTGCCTA<br>Ref.: [2]          |
| <i>Clostridium coccooides group</i>         | <i>Clostridium coccooides</i> DSMZ 935     | F: AAATGACGGTACCTGACTAA<br>R: CTTTGAGTTTCATTCTTGCGAA<br>Ref.: [3]  |
| <i>Bacteroides/Prevotella spp.</i>          | <i>Bacteroides ovatus</i> DSMZ 1896        | F: GAAGGTCCCCACATTG<br>R: CAATCGGAGTTCTTCGTG<br>Ref.: [4]          |
| <i>γ-Proteobacterial/Enterobacteriaceae</i> | <i>Escherichia coli</i> ATCC 25922         | F: AAATCAAATGAATTGACGG<br>R: CTTTTCGAACCCACTCC<br>Ref.: [5]        |
| <i>Lactobacillus group</i>                  | <i>Lactobacillus acidophilus</i> DSM 20079 | F: CACCGCTACACATGGAG<br>R: AGCAGTAGGGAATCTTCCA<br>Ref.: [6,7]      |
| <i>Bifidobacterium genus</i>                | <i>Bifidobacterium sp.</i> (murine origin) | F: CTCCTGGAAACGGGTGG<br>R: GGTTCTTCCCGATATCTACA<br>Ref.: [3,6,7]   |
| <i>Enterococcus genus</i>                   | <i>Enterococcus faecalis</i> DSM 20478     | F: CCTTATTGTTAGTTGCCATCATT<br>R: ACTCGTTGACTTCCCATTGT<br>Ref.: [8] |
| <i>Mouse Intestinal Bacteroides</i>         | MIB plasmid 16-1                           | F: CCAGCAGCCGCGGTAATA<br>R: CGCATTCCGCATACTTCTC<br>Ref.: [9]       |

**Supplemental Table 1:** <sup>a</sup> – modified from: Ref. [10]. <sup>b</sup> – F = Forward, R = Reverse.

**Supplemental Table S2: qPCR primers for hepatic and intestinal analysis**

| <b>Gene</b>   | <b>Species</b> | <b>Assay-ID</b> | <b>RefSeq</b>                                   |
|---------------|----------------|-----------------|-------------------------------------------------|
| <i>Abca1</i>  | Mouse          | Mm00442646_m1   | NM_013454.3                                     |
| <i>Abcg5</i>  | Mouse          | Mm00446241_m1   | NM_031884.1                                     |
| <i>Acat2</i>  | Mouse          | Mm00782408_s1   | NM_009338.3                                     |
| <i>Asbt</i>   | Mouse          | Mm00488258_m1   | NM_011388.2                                     |
| <i>Cyp7a1</i> | Mouse          | Mm00484150_m1   | NM_007824.2                                     |
| <i>Exr</i>    | Mouse          | Mm00436425_m1   | NM_001163504.1<br>NM_001163700.1<br>NM_009108.2 |
| <i>Gapdh</i>  | Mouse          | Mm99999915_g1   | NM_001289726.1<br>NM_008084.3                   |
| <i>Hmgcr</i>  | Mouse          | Mm01282499_m1   | NM_008255.2                                     |
| <i>Ldlr</i>   | Mouse          | Mm01177349_m1   | NM_001252658.1<br>NM_001252659.1<br>NM_010700.3 |
| <i>Npc1l1</i> | Mouse          | Mm01191973_m1   | NM_207242.2                                     |
| <i>Pcsk9</i>  | Mouse          | Mm01263610_m1   | NM_153565.2                                     |
| <i>Srb1</i>   | Mouse          | Mm00450234_m1   | NM_001205082.1<br>NM_001205083.1<br>NM_016741.2 |
| <i>Srebp2</i> | Mouse          | Mm01306292_m1   | NM_033218.1                                     |

**Supplemental Table S3: Effect of atorvastatin on selected lipids**  
**CONV – Glycerophospholipids**

| Metabolite      | SCD         | HFD          | HFD + Ator   | p: SCD :<br>HFD | p: SCD :<br>HFD + Ator | p: HFD :<br>HFD + Ator |
|-----------------|-------------|--------------|--------------|-----------------|------------------------|------------------------|
| <b>lysoPC a</b> |             |              |              |                 |                        |                        |
| C16:0           | 187,8 ± 8,0 | 154,4 ± 10,9 | 126,4 ± 11,7 | 0,052           | 0,005                  | 0,119                  |
| C16:1           | 9,8 ± 0,9   | 6,4 ± 0,4    | 5,6 ± 0,5    | 0,009           | 0,004                  | 0,287                  |
| C17:0           | 2,3 ± 0,1   | 7,8 ± 0,5    | 6,7 ± 0,5    | <0,001          | <0,001                 | 0,157                  |
| C18:0           | 79,0 ± 5,4  | 115,9 ± 9,8  | 104,0 ± 9,1  | 0,018           | 0,064                  | 0,4                    |
| C18:1           | 77,5 ± 4,5  | 109,6 ± 7,5  | 89,6 ± 7,7   | 0,012           | 0,248                  | 0,101                  |
| C18:2           | 111,0 ± 5,2 | 135,9 ± 14,2 | 99,4 ± 6,2   | 0,18            | 0,207                  | 0,046                  |
| C20:3           | 8,9 ± 0,7   | 12,6 ± 1,0   | 10,6 ± 1,1   | 0,027           | 0,255                  | 0,216                  |
| C20:4           | 42,3 ± 5,0  | 51,6 ± 4,1   | 48,6 ± 4,7   | 0,193           | 0,391                  | 0,643                  |
| C24:0           | 0,5 ± 0,0   | 0,7 ± 0,2    | 0,5 ± 0,1    | 0,37            | 0,755                  | 0,32                   |
| C28:0           | 0,3 ± 0,0   | 0,5 ± 0,1    | 0,5 ± 0,1    | 0,058           | 0,148                  | 0,658                  |
| <b>PC aa</b>    |             |              |              |                 |                        |                        |
| C28:1           | 0,3 ± 0,0   | 0,6 ± 0,1    | 0,3 ± 0,0    | 0,071           | 0,027                  | 0,119                  |
| C30:0           | 0,6 ± 0,0   | 0,9 ± 0,1    | 0,7 ± 0,0    | 0,047           | 0,064                  | 0,14                   |
| C32:0           | 9,5 ± 0,8   | 7,1 ± 0,6    | 6,1 ± 0,4    | 0,049           | 0,005                  | 0,248                  |
| C32:1           | 6,2 ± 1,0   | 4,1 ± 0,4    | 3,9 ± 0,3    | 0,07            | 0,04                   | 0,579                  |
| C32:2           | 0,9 ± 0,1   | 0,7 ± 0,1    | 0,6 ± 0,1    | 0,134           | 0,015                  | 0,16                   |
| C32:3           | 0,1 ± 0,0   | 0,2 ± 0,0    | 0,2 ± 0,0    | 0,006           | 0,128                  | 0,148                  |
| C34:1           | 97,4 ± 9,9  | 126,2 ± 8,9  | 112,7 ± 7,6  | 0,067           | 0,251                  | 0,278                  |
| C34:2           | 184,5 ± 7,5 | 187,4 ± 19,1 | 153,6 ± 6,9  | 0,9             | 0,019                  | 0,134                  |
| C34:3           | 8,4 ± 0,4   | 8,2 ± 0,9    | 6,7 ± 0,5    | 0,817           | 0,031                  | 0,159                  |
| C34:4           | 0,5 ± 0,0   | 0,5 ± 0,1    | 0,5 ± 0,0    | 0,786           | 0,835                  | 0,646                  |
| C36:0           | 0,9 ± 0,1   | 1,7 ± 0,1    | 1,5 ± 0,2    | 0,002           | 0,037                  | 0,359                  |
| C36:1           | 22,0 ± 3,5  | 74,9 ± 5,7   | 60,8 ± 4,7   | <0,001          | <0,001                 | 0,091                  |
| C36:2           | 133,0 ± 6,6 | 196,6 ± 14,6 | 170,2 ± 5,0  | 0,009           | 0,003                  | 0,127                  |
| C36:3           | 58,4 ± 0,3  | 70,4 ± 7,0   | 60,3 ± 2,8   | 0,247           | 0,627                  | 0,219                  |
| C36:4           | 93,3 ± 9,3  | 92,4 ± 9,4   | 87,3 ± 8,8   | 0,951           | 0,654                  | 0,7                    |
| C36:5           | 5,3 ± 0,3   | 5,2 ± 0,5    | 5,1 ± 0,6    | 0,873           | 0,786                  | 0,899                  |
| C36:6           | 0,4 ± 0,0   | 0,4 ± 0,0    | 0,3 ± 0,0    | 0,869           | 0,295                  | 0,47                   |
| C38:0           | 1,0 ± 0,1   | 1,7 ± 0,1    | 1,4 ± 0,1    | <0,001          | 0,036                  | 0,19                   |
| C38:3           | 14,6 ± 1,0  | 24,8 ± 2,2   | 23,4 ± 2,4   | 0,006           | 0,018                  | 0,671                  |
| C38:4           | 61,5 ± 6,5  | 91,7 ± 7,9   | 96,3 ± 7,5   | 0,025           | 0,011                  | 0,685                  |
| C38:5           | 25,9 ± 2,4  | 28,4 ± 1,7   | 30,9 ± 2,4   | 0,41            | 0,188                  | 0,423                  |
| C38:6           | 69,3 ± 7,0  | 69,1 ± 5,3   | 66,6 ± 6,0   | 0,986           | 0,779                  | 0,76                   |
| C40:2           | 0,1 ± 0,0   | 0,2 ± 0,0    | 0,1 ± 0,0    | 0,086           | 0,998                  | 0,039                  |
| C40:3           | 0,1 ± 0,0   | 0,2 ± 0,0    | 0,2 ± 0,0    | 0,02            | 0,009                  | 0,455                  |
| C40:4           | 0,9 ± 0,0   | 1,3 ± 0,1    | 1,3 ± 0,1    | 0,002           | 0,018                  | 0,749                  |
| C40:5           | 2,2 ± 0,1   | 2,2 ± 0,0    | 2,4 ± 0,2    | 0,284           | 0,285                  | 0,507                  |
| C40:6           | 25,7 ± 1,4  | 37,4 ± 2,6   | 37,0 ± 3,3   | 0,008           | 0,023                  | 0,93                   |
| C42:1           | 0,1 ± 0,0   | 0,1 ± 0,0    | 0,1 ± 0,0    | 0,123           | 0,211                  | 0,233                  |
| C42:4           | 0,1 ± 0,0   | 0,1 ± 0,0    | 0,1 ± 0,0    | 0,306           | 0,249                  | 0,992                  |
| C42:5           | 0,1 ± 0,0   | 0,1 ± 0,0    | 0,1 ± 0,0    | 0,135           | 0,313                  | 0,566                  |
| <b>PC ae</b>    |             |              |              |                 |                        |                        |
| C30:2           | 0,1 ± 0,0   | 0,1 ± 0,0    | 0,1 ± 0,0    | 0,142           | <0,001                 | 0,299                  |
| C32:1           | 0,3 ± 0,0   | 0,5 ± 0,1    | 0,4 ± 0,0    | 0,142           | 0,082                  | 0,338                  |

|       |           |            |            |        |        |       |
|-------|-----------|------------|------------|--------|--------|-------|
| C32:2 | 0,1 ± 0,0 | 0,2 ± 0,0  | 0,2 ± 0,0  | 0,031  | 0,038  | 0,184 |
| C34:0 | 0,3 ± 0,0 | 1,2 ± 0,1  | 0,9 ± 0,0  | 0,001  | <0,001 | 0,079 |
| C34:1 | 2,5 ± 0,2 | 4,9 ± 0,4  | 4,4 ± 0,3  | 0,001  | 0,001  | 0,332 |
| C34:2 | 1,4 ± 0,1 | 2,0 ± 0,2  | 1,7 ± 0,1  | 0,02   | 0,085  | 0,116 |
| C34:3 | 0,4 ± 0,0 | 0,5 ± 0,0  | 0,4 ± 0,0  | 0,015  | 0,992  | 0,042 |
| C36:0 | 0,2 ± 0,0 | 0,6 ± 0,0  | 0,4 ± 0,1  | <0,001 | 0,021  | 0,04  |
| C36:1 | 1,6 ± 0,2 | 7,8 ± 0,6  | 6,9 ± 0,4  | <0,001 | <0,001 | 0,251 |
| C36:2 | 4,1 ± 0,3 | 13,1 ± 1,3 | 10,6 ± 0,4 | <0,001 | <0,001 | 0,096 |
| C36:3 | 1,0 ± 0,1 | 2,2 ± 0,2  | 1,8 ± 0,1  | 0,002  | <0,001 | 0,173 |
| C36:4 | 2,2 ± 0,4 | 2,4 ± 0,2  | 2,1 ± 0,2  | 0,667  | 0,911  | 0,41  |
| C36:5 | 1,1 ± 0,1 | 1,0 ± 0,1  | 0,9 ± 0,1  | 0,778  | 0,425  | 0,435 |
| C38:0 | 2,0 ± 0,2 | 2,2 ± 0,1  | 2,2 ± 0,2  | 0,436  | 0,527  | 0,968 |
| C38:1 | 0,5 ± 0,1 | 1,3 ± 0,1  | 1,2 ± 0,1  | <0,001 | <0,001 | 0,3   |
| C38:2 | 1,5 ± 0,0 | 2,3 ± 0,2  | 1,9 ± 0,1  | 0,005  | 0,027  | 0,132 |
| C38:3 | 1,0 ± 0,1 | 2,3 ± 0,2  | 2,1 ± 0,2  | <0,001 | <0,001 | 0,517 |
| C38:4 | 2,4 ± 0,2 | 6,4 ± 0,4  | 5,9 ± 0,1  | <0,001 | <0,001 | 0,375 |
| C38:5 | 2,4 ± 0,3 | 3,1 ± 0,2  | 3,0 ± 0,3  | 0,096  | 0,164  | 0,797 |
| C38:6 | 1,1 ± 0,1 | 1,4 ± 0,1  | 1,2 ± 0,1  | 0,112  | 0,618  | 0,205 |
| C40:1 | 2,3 ± 0,1 | 2,5 ± 0,2  | 2,3 ± 0,2  | 0,359  | 0,813  | 0,574 |
| C40:2 | 0,3 ± 0,0 | 0,6 ± 0,0  | 0,5 ± 0,1  | 0,004  | 0,009  | 0,979 |
| C40:3 | 0,3 ± 0,0 | 0,6 ± 0,0  | 0,6 ± 0,1  | 0,002  | 0,004  | 0,49  |
| C40:4 | 0,7 ± 0,1 | 1,1 ± 0,1  | 1,1 ± 0,1  | 0,017  | 0,012  | 0,728 |
| C40:5 | 0,6 ± 0,0 | 1,0 ± 0,1  | 1,0 ± 0,1  | 0,003  | 0,005  | 0,918 |
| C40:6 | 1,4 ± 0,1 | 4,4 ± 0,2  | 4,2 ± 0,3  | <0,001 | <0,001 | 0,618 |
| C42:1 | 0,3 ± 0,0 | 0,3 ± 0,0  | 0,3 ± 0,0  | 0,9    | 0,446  | 0,299 |
| C42:2 | 0,4 ± 0,0 | 0,5 ± 0,0  | 0,4 ± 0,0  | 0,004  | 0,186  | 0,2   |
| C42:3 | 1,1 ± 0,1 | 1,1 ± 0,1  | 1,1 ± 0,1  | 0,91   | 0,912  | 0,973 |
| C44:3 | 0,1 ± 0,0 | 0,2 ± 0,0  | 0,1 ± 0,0  | 0,014  | 0,167  | 0,069 |
| C44:5 | 0,2 ± 0,0 | 0,2 ± 0,0  | 0,2 ± 0,0  | 0,966  | 0,331  | 0,539 |

### ABS – Glycerophospholipids

| Metabolite | SCD          | HFD          | HFD + Ator    | p: SCD :<br>HFD | p: SCD :<br>HFD + Ator | p: HFD :<br>HFD + Ator |
|------------|--------------|--------------|---------------|-----------------|------------------------|------------------------|
| lysoPC a   |              |              |               |                 |                        |                        |
| C16:0      | 212,3 ± 32,6 | 130,3 ± 3,9  | 112,4 ± 4,3   | 0,047           | 0,011                  | 0,02                   |
| C16:1      | 7,4 ± 1,0    | 5,4 ± 0,3    | 5,0 ± 0,4     | 0,11            | 0,043                  | 0,412                  |
| C17:0      | 3,1 ± 0,3    | 6,5 ± 0,2    | 5,8 ± 0,2     | <0,001          | <0,001                 | 0,1                    |
| C18:0      | 101,3 ± 15,9 | 101,3 ± 3,4  | 93,9 ± 2,6    | 0,998           | 0,622                  | 0,119                  |
| C18:1      | 66,2 ± 12,9  | 88,6 ± 8,4   | 85,8 ± 4,9    | 0,198           | 0,164                  | 0,775                  |
| C18:2      | 133 ± 12,9   | 114,7 ± 15,4 | 102,6 ± 10,9  | 0,398           | 0,114                  | 0,513                  |
| C20:3      | 8,3 ± 1,5    | 10,4 ± 1,5   | 10,3 ± 0,7    | 0,366           | 0,229                  | 0,953                  |
| C20:4      | 49,5 ± 10,2  | 33,1 ± 1,4 b | 31,6 ± 1,4 b  | 0,162           | 0,09                   | 0,49                   |
| C24:0      | 0,6 ± 0,0    | 0,5 ± 0,0    | 0,5 ± 0,0     | 0,092           | 0,381                  | 0,31                   |
| C28:0      | 0,5 ± 0,1    | 0,4 ± 0,1    | 0,5 ± 0,1     | 0,607           | 0,941                  | 0,423                  |
| PC aa      |              |              |               |                 |                        |                        |
| C28:1      | 0,4 ± 0,1    | 0,4 ± 0,0    | 0,4 ± 0,0 b   | 0,928           | 0,743                  | 0,383                  |
| C30:0      | 0,9 ± 0,1 a  | 0,7 ± 0,1    | 0,7 ± 0,0     | 0,184           | 0,075                  | 0,91                   |
| C32:0      | 10,6 ± 1,0   | 6,2 ± 0,0    | 5,6 ± 0,2     | 0,01            | <0,001                 | 0,071                  |
| C32:1      | 4,4 ± 0,5    | 3,7 ± 0,0    | 5,4 ± 0,9     | 0,312           | 0,4                    | 0,211                  |
| C32:2      | 0,8 ± 0,1    | 0,7 ± 0,1    | 0,8 ± 0,1     | 0,45            | 0,685                  | 0,69                   |
| C32:3      | 0,1 ± 0,0    | 0,2 ± 0,01   | 0,2 ± 0,0 a   | 0,015           | 0,002                  | 0,609                  |
| C34:1      | 89,3 ± 11,9  | 119,7 ± 0,9  | 142,8 ± 9,5 a | 0,084           | 0,009                  | 0,119                  |

|       |              |              |               |         |         |       |
|-------|--------------|--------------|---------------|---------|---------|-------|
| C34:2 | 220,8±10,8 a | 184 ± 15,4   | 187,4 ± 9,9 a | 0,099   | 0,057   | 0,852 |
| C34:3 | 8,9 ± 0,8    | 7,8 ± 0,9    | 8,9 ± 1,1     | 0,514   | 0,835   | 0,481 |
| C34:4 | 0,4 ± 0,1    | 0,5 ± 0,0    | 0,5 ± 0,1     | 0,457   | 0,203   | 0,518 |
| C36:0 | 1,2 ± 0,1    | 1,9 ± 0,2    | 1,4 ± 0,1     | 0,015   | 0,284   | 0,02  |
| C36:1 | 21 ± 2,5     | 70,9 ± 11    | 76,7 ± 3,4 a  | 0,005   | < 0,001 | 0,519 |
| C36:2 | 164 ± 3,8 b  | 205 ± 18,5   | 204,2 ± 8,5 b | 0,073   | 0,006   | 0,968 |
| C36:3 | 58,9 ± 7,3   | 65,1 ± 7,9   | 70,3 ± 5,7    | 0,585   | 0,249   | 0,6   |
| C36:4 | 100,2 ± 11,4 | 72,2 ± 3,9   | 77,9 ± 5,5    | 0,06    | 0,1     | 0,447 |
| C36:5 | 5,1 ± 0,4    | 5,8 ± 0,6    | 6,9 ± 0,6     | 0,366   | 0,061   | 0,265 |
| C36:6 | 0,3 ± 0,0    | 0,3 ± 0,0    | 0,4 ± 0,0     | 0,457   | 0,088   | 0,231 |
| C38:0 | 1,0 ± 0,0    | 1,4 ± 0,0 a  | 1,3 ± 0,1     | 0,004   | 0,006   | 0,821 |
| C38:3 | 15,1 ± 1,5   | 23,5 ± 3,2   | 25,9 ± 1,4    | 0,053   | 0,001   | 0,482 |
| C38:4 | 68,1 ± 7,1   | 70,9 ± 3,8   | 77,2 ± 3,9    | 0,739   | 0,273   | 0,294 |
| C38:5 | 23,9 ± 3,7   | 22,0 ± 1,9 a | 25,8 ± 1,5    | 0,678   | 0,618   | 0,164 |
| C38:6 | 72,5 ± 8,0   | 61,3 ± 4,2   | 61,5 ± 5,3    | 0,264   | 0,273   | 0,976 |
| C40:2 | 0,2 ± 0,0    | 0,1 ± 0,0    | 0,2 ± 0,0     | 0,11    | 0,4     | 0,374 |
| C40:3 | 0,2 ± 0,0 a  | 0,2 ± 0,0    | 0,2 ± 0,0     | 0,212   | 0,844   | 0,211 |
| C40:4 | 1,1 ± 0,1    | 1,1 ± 0,1    | 1,2 ± 0,0     | 0,976   | 0,523   | 0,276 |
| C40:5 | 2,5 ± 0,6    | 2,0 ± 0,1 a  | 2,4 ± 0,2     | 0,393   | 0,798   | 0,143 |
| C40:6 | 27,7 ± 2,1   | 32,3 ± 2,4   | 35,7 ± 2,7    | 0,197   | 0,062   | 0,395 |
| C42:1 | 0,1 ± 0,0    | 0,1 ± 0,0    | 0,1 ± 0,0     | 0,795   | 0,886   | 0,659 |
| C42:4 | 0,1 ± 0,0    | 0,1 ± 0,0    | 0,1 ± 0,0 a   | 0,039   | 0,016   | 0,678 |
| C42:5 | 0,1 ± 0,0 c  | 0,1 ± 0,0 a  | 0,1 ± 0,0     | < 0,001 | 0,002   | 0,178 |
| PC ae |              |              |               |         |         |       |
| C30:2 | 0,1 ± 0,0 a  | 0,1 ± 0,0    | 0,1 ± 0,0     | 0,26    | 0,181   | 0,731 |
| C32:1 | 0,4 ± 0,0 a  | 0,4 ± 0,0    | 0,4 ± 0,0     | 0,727   | 0,619   | 0,838 |
| C32:2 | 0,3 ± 0,1 a  | 0,2 ± 0,0    | 0,2 ± 0,0     | 0,784   | 0,236   | 0,001 |
| C34:0 | 0,4 ± 0,0    | 0,9 ± 0,0    | 0,9 ± 0,1     | < 0,001 | < 0,001 | 0,976 |
| C34:1 | 2,6 ± 0,1    | 4,4 ± 0,1    | 5,1 ± 0,2     | < 0,001 | < 0,001 | 0,018 |
| C34:2 | 1,6 ± 0,1    | 2,2 ± 0,2    | 2,2 ± 0,2 a   | 0,058   | 0,027   | 0,927 |
| C34:3 | 0,6 ± 0,0 b  | 0,6 ± 0,0    | 0,7 ± 0,0 c   | 0,553   | 0,046   | 0,08  |
| C36:0 | 0,3 ± 0,0    | 0,5 ± 0,0 a  | 0,5 ± 0,0     | 0,005   | 0,028   | 0,921 |
| C36:1 | 1,9 ± 0,2    | 8,0 ± 1,2    | 8,8 ± 0,5 a   | 0,002   | < 0,001 | 0,539 |
| C36:2 | 5,6 ± 0,3 a  | 12,4 ± 1,8   | 13,9 ± 1,0 a  | 0,009   | < 0,001 | 0,46  |
| C36:3 | 1,0 ± 0,1    | 1,9 ± 0,3    | 2,1 ± 0,2     | 0,039   | 0,002   | 0,561 |
| C36:4 | 1,7 ± 0,2    | 2,0 ± 0,1    | 2,1 ± 0,1     | 0,182   | 0,492   | 0,506 |
| C36:5 | 1,4 ± 0,1    | 1,2 ± 0,1    | 1,2 ± 0,0     | 0,298   | 0,168   | 0,936 |
| C38:0 | 1,8 ± 0,2    | 1,8 ± 0,1    | 2,0 ± 0,1     | 0,915   | 0,567   | 0,338 |
| C38:1 | 0,7 ± 0,0 a  | 1,1 ± 0,2    | 1,3 ± 0,1     | 0,036   | < 0,001 | 0,432 |
| C38:2 | 1,9 ± 0,0 c  | 2,1 ± 0,2    | 2,2 ± 0,2     | 0,628   | 0,295   | 0,678 |
| C38:3 | 1,1 ± 0,1    | 2,2 ± 0,3    | 2,4 ± 0,1     | 0,017   | < 0,001 | 0,471 |
| C38:4 | 2,6 ± 0,3    | 5,0 ± 0,3 a  | 5,4 ± 0,2     | 0,001   | < 0,001 | 0,251 |
| C38:5 | 2,1 ± 0,2    | 2,5 ± 0,0    | 2,7 ± 0,1     | 0,274   | 0,061   | 0,248 |
| C38:6 | 1,1 ± 0,1    | 1,3 ± 0,1    | 1,4 ± 0,1     | 0,121   | 0,08    | 0,573 |
| C40:1 | 1,6 ± 0,2 a  | 1,5 ± 0,2 b  | 1,6 ± 0,1 a   | 0,643   | 0,962   | 0,536 |
| C40:2 | 0,4 ± 0,0    | 0,5 ± 0,0    | 0,5 ± 0,0     | 0,026   | 0,013   | 0,494 |
| C40:3 | 0,4 ± 0,0    | 0,5 ± 0,0    | 0,5 ± 0,0     | 0,133   | 0,039   | 0,443 |
| C40:4 | 0,8 ± 0,1    | 0,8 ± 0,1    | 0,9 ± 0,0     | 0,691   | 0,268   | 0,575 |
| C40:5 | 0,6 ± 0,1    | 0,7 ± 0,0 a  | 0,8 ± 0,1 a   | 0,25    | 0,166   | 0,566 |
| C40:6 | 1,4 ± 0,1    | 3,7 ± 0,2 a  | 3,9 ± 0,3     | < 0,001 | < 0,001 | 0,555 |
| C42:1 | 0,3 ± 0,0    | 0,2 ± 0,0 a  | 0,2 ± 0,0     | 0,039   | 0,073   | 0,034 |
| C42:2 | 0,3 ± 0,0    | 0,3 ± 0,0 a  | 0,4 ± 0,0     | 0,5     | < 0,001 | 0,058 |
| C42:3 | 0,7 ± 0,0 b  | 0,7 ± 0,1 b  | 0,7 ± 0,0 a   | 0,7     | 0,36    | 0,261 |
| C44:3 | 0,1 ± 0,0 a  | 0,1 ± 0,0    | 0,1 ± 0,0     | 0,638   | 0,372   | 0,254 |

|       |             |           |           |       |       |     |
|-------|-------------|-----------|-----------|-------|-------|-----|
| C44:5 | 0,2 ± 0,0 b | 0,2 ± 0,0 | 0,2 ± 0,0 | 0,897 | 0,133 | 0,4 |
|-------|-------------|-----------|-----------|-------|-------|-----|

## CONV – Triacylglycerols

| Metabolite       | SCD         | HFD         | HFD + Ator | p: SCD :<br>HFD | p: SCD :<br>HFD + Ator | p: HFD :<br>HFD + Ator |
|------------------|-------------|-------------|------------|-----------------|------------------------|------------------------|
| <b>TG (14:0)</b> |             |             |            |                 |                        |                        |
| 34:1             | 2,6 ± 0,4   | 3,3 ± 0,7   | 2,4 ± 0,5  | 0,577           | 0,78                   | 0,388                  |
| 34:2             | 1,4 ± 0,4   | 1,4 ± 0,4   | 0,8 ± 0,1  | 0,929           | 0,153                  | 0,171                  |
| 36:1             | 1,1 ± 0,1   | 3,3 ± 0,6   | 2,4 ± 0,3  | 0,012           | 0,007                  | 0,166                  |
| 36:2             | 2,7 ± 0,4   | 3,3 ± 0,9   | 2,4 ± 0,5  | 0,58            | 0,619                  | 0,375                  |
| 36:3             | 1,4 ± 0,3   | 1,2 ± 0,4   | 0,8 ± 0,2  | 0,646           | 0,09                   | 0,37                   |
| 36:4             | 0,4 ± 0,0   | 0,4 ± 0,0   | 0,2 ± 0,0  | 0,273           | 0,07                   | 0,048                  |
| <b>TG (16:0)</b> |             |             |            |                 |                        |                        |
| 32:1             | 9,4 ± 1,7   | 6,7 ± 1,6   | 4,8 ± 1,1  | 0,362           | 0,089                  | 0,403                  |
| 32:2             | 3,1 ± 1,0   | 2,0 ± 0,4   | 1,5 ± 0,3  | 0,346           | 0,222                  | 0,355                  |
| 32:3             | 0,3 ± 0,1   | 0,4 ± 0,1   | 0,2 ± 0,0  | 0,734           | 0,121                  | 0,238                  |
| 34:1             | 27,2 ± 9,7  | 32,6 ± 8,3  | 18,3 ± 2,8 | 0,687           | 0,309                  | 0,113                  |
| 34:2             | 29,2 ± 8,5  | 15,2 ± 4,1  | 11,6 ± 1,6 | 0,157           | 0,056                  | 0,429                  |
| 34:3             | 6,2 ± 1,3   | 2,5 ± 0,7   | 1,9 ± 0,3  | 0,032           | 0,009                  | 0,451                  |
| 34:4             | 0,5 ± 0,1   | 0,3 ± 0,1   | 0,3 ± 0,0  | 0,141           | 0,015                  | 0,344                  |
| 35:2             | 1,1 ± 0,3   | 2,4 ± 0,6   | 1,8 ± 0,3  | 0,098           | 0,121                  | 0,351                  |
| 35:3             | 0,3 ± 0,1   | 0,5 ± 0,1   | 0,4 ± 0,1  | 0,213           | 0,457                  | 0,383                  |
| 36:2             | 55,1 ± 10,2 | 60,3 ± 14,9 | 44,3 ± 6,7 | 0,794           | 0,387                  | 0,355                  |
| 36:3             | 30,2 ± 6,1  | 18,8 ± 4,7  | 14,9 ± 2,0 | 0,178           | 0,034                  | 0,465                  |
| 36:4             | 10,5 ± 3,1  | 3,2 ± 0,9   | 2,2 ± 0,3  | 0,042           | 0,019                  | 0,265                  |
| 36:5             | 2,1 ± 0,8   | 0,5 ± 0,1   | 0,3 ± 0,0  | 0,051           | 0,031                  | 0,202                  |
| 37:3             | 0,3 ± 0,1   | 0,5 ± 0,1   | 0,2 ± 0,0  | 0,204           | 0,076                  | 0,026                  |
| 38:2             | 1,2 ± 0,3   | 1,3 ± 0,2   | 1,1 ± 0,2  | 0,808           | 0,724                  | 0,426                  |
| 38:3             | 1,3 ± 0,3   | 1,1 ± 0,3   | 0,9 ± 0,1  | 0,498           | 0,115                  | 0,531                  |
| 38:4             | 1,4 ± 0,3   | 1,4 ± 0,3   | 1,1 ± 0,1  | 0,949           | 0,249                  | 0,31                   |
| 38:5             | 1,6 ± 0,4   | 1,1 ± 0,2   | 0,9 ± 0,1  | 0,241           | 0,062                  | 0,42                   |
| 38:6             | 0,9 ± 0,2   | 0,7 ± 0,2   | 0,5 ± 0,0  | 0,494           | 0,116                  | 0,455                  |
| 40:6             | 1,0 ± 0,2   | 0,8 ± 0,2   | 0,6 ± 0,1  | 0,389           | 0,016                  | 0,499                  |
| 40:7             | 1,3 ± 0,3   | 1,7 ± 0,4   | 1,2 ± 0,1  | 0,435           | 0,824                  | 0,196                  |
| 40:8             | 0,5 ± 0,2   | 0,5 ± 0,1   | 0,3 ± 0,0  | 0,91            | 0,313                  | 0,167                  |
| <b>TG (16:1)</b> |             |             |            |                 |                        |                        |
| 34:0             | 2,1 ± 0,7   | 2,2 ± 0,5   | 1,3 ± 0,2  | 0,911           | 0,236                  | 0,118                  |
| 34:1             | 20,4 ± 5,8  | 10,2 ± 2,6  | 7,9 ± 1,2  | 0,125           | 0,05                   | 0,4                    |
| 34:2             | 10,8 ± 1,6  | 5,1 ± 0,8   | 3,7 ± 0,6  | 0,02            | 0,003                  | 0,205                  |
| 34:3             | 1,7 ± 0,1   | 0,6 ± 0,1   | 0,5 ± 0,1  | 0,001           | <0,001                 | 0,6                    |
| 36:1             | 2,2 ± 0,2   | 3,0 ± 0,7   | 2,3 ± 0,4  | 0,376           | 0,923                  | 0,379                  |
| 36:2             | 13,9 ± 1,2  | 12,5 ± 2,6  | 11,0 ± 2,0 | 0,672           | 0,294                  | 0,677                  |
| 36:3             | 5,9 ± 1,0   | 3,3 ± 0,7   | 2,9 ± 0,5  | 0,065           | 0,024                  | 0,7                    |
| 36:4             | 1,6 ± 0,3   | 0,5 ± 0,1   | 0,4 ± 0,1  | 0,007           | 0,003                  | 0,645                  |
| 38:3             | 0,4 ± 0,1   | 0,3 ± 0,0   | 0,3 ± 0,0  | 0,24            | 0,359                  | 0,624                  |

|                  |             |              |            |       |       |       |
|------------------|-------------|--------------|------------|-------|-------|-------|
| 38:4             | 0,5 ± 0,0   | 0,4 ± 0,1    | 0,3 ± 0,0  | 0,186 | 0,006 | 0,624 |
| 38:5             | 0,5 ± 0,1   | 0,3 ± 0,1    | 0,3 ± 0,0  | 0,192 | 0,057 | 0,442 |
| <b>TG (17:0)</b> |             |              |            |       |       |       |
| 34:2             | 0,5 ± 0,0   | 0,9 ± 0,2    | 0,7 ± 0,1  | 0,185 | 0,13  | 0,431 |
| 36:3             | 0,4 ± 0,0   | 0,9 ± 0,2    | 0,7 ± 0,1  | 0,1   | 0,039 | 0,57  |
| 36:4             | 0,3 ± 0,1   | 0,2 ± 0,0    | 0,2 ± 0,0  | 0,768 | 0,14  | 0,085 |
| <b>TG (17:1)</b> |             |              |            |       |       |       |
| 34:1             | 1,0 ± 0,2   | 2,1 ± 0,5    | 1,4 ± 0,2  | 0,12  | 0,161 | 0,261 |
| 34:2             | 0,6 ± 0,1   | 0,9 ± 0,1    | 0,7 ± 0,0  | 0,021 | 0,143 | 0,074 |
| 36:3             | 0,3 ± 0,0   | 0,5 ± 0,1    | 0,4 ± 0,1  | 0,263 | 0,282 | 0,625 |
| <b>TG (18:0)</b> |             |              |            |       |       |       |
| 32:2             | 0,2 ± 0,0   | 0,7 ± 0,2    | 0,5 ± 0,1  | 0,069 | 0,093 | 0,442 |
| 34:2             | 2,1 ± 0,5   | 4,3 ± 1,2    | 2,9 ± 0,4  | 0,181 | 0,25  | 0,329 |
| 34:3             | 0,5 ± 0,1   | 0,7 ± 0,2    | 0,6 ± 0,1  | 0,41  | 0,598 | 0,526 |
| 36:3             | 3,2 ± 0,8   | 4,5 ± 1,3    | 3,3 ± 0,6  | 0,449 | 0,961 | 0,406 |
| 36:4             | 2,2 ± 0,8   | 1,0 ± 0,3    | 0,7 ± 0,1  | 0,15  | 0,057 | 0,332 |
| 38:6             | 0,2 ± 0,0   | 0,3 ± 0,0    | 0,2 ± 0,0  | 0,075 | 0,246 | 0,132 |
| <b>TG (18:1)</b> |             |              |            |       |       |       |
| 30:0             | 2,8 ± 0,2   | 4,3 ± 0,9    | 3,3 ± 0,7  | 0,315 | 0,637 | 0,429 |
| 30:1             | 1,7 ± 0,2   | 1,9 ± 0,2    | 1,4 ± 0,2  | 0,559 | 0,467 | 0,218 |
| 32:0             | 10,3 ± 3,2  | 15,4 ± 4,7   | 10,1 ± 1,8 | 0,425 | 0,972 | 0,329 |
| 32:1             | 22,7 ± 5,5  | 15,8 ± 3,9   | 10,9 ± 1,9 | 0,334 | 0,062 | 0,294 |
| 32:2             | 4,5 ± 0,5   | 3,6 ± 0,6    | 2,5 ± 0,5  | 0,276 | 0,021 | 0,16  |
| 32:3             | 0,2 ± 0,0   | 0,4 ± 0,1    | 0,3 ± 0,1  | 0,262 | 0,493 | 0,56  |
| 33:2             | 0,6 ± 0,1   | 1,1 ± 0,3    | 0,7 ± 0,1  | 0,164 | 0,466 | 0,227 |
| 34:1             | 92,6 ± 17,3 | 123,6 ± 20,4 | 93,3 ± 1,3 | 0,29  | 0,974 | 0,266 |
| 34:2             | 47,0 ± 5,9  | 35,5 ± 8,4   | 29,4 ± 4,2 | 0,327 | 0,041 | 0,531 |
| 34:3             | 7,8 ± 1,4   | 4,9 ± 1,2    | 3,8 ± 0,7  | 0,159 | 0,032 | 0,471 |
| 34:4             | 0,7 ± 0,1   | 0,5 ± 0,1    | 0,3 ± 0,1  | 0,201 | 0,005 | 0,387 |
| 35:2             | 1,2 ± 0,0   | 3,7 ± 0,8    | 3,0 ± 0,5  | 0,068 | 0,035 | 0,469 |
| 35:3             | 0,4 ± 0,0   | 0,7 ± 0,2    | 0,5 ± 0,1  | 0,329 | 0,469 | 0,414 |
| 36:3             | 34,1 ± 6,8  | 22,9 ± 4,6   | 18,5 ± 2,4 | 0,221 | 0,073 | 0,431 |
| 36:4             | 15,1 ± 5,0  | 4,6 ± 1,0    | 3,0 ± 0,4  | 0,087 | 0,029 | 0,141 |
| 36:5             | 3,1 ± 1,1   | 0,7 ± 0,2    | 0,5 ± 0,1  | 0,038 | 0,028 | 0,414 |
| 38:5             | 1,9 ± 0,3   | 2,0 ± 0,5    | 1,6 ± 0,2  | 0,869 | 0,46  | 0,476 |
| 38:6             | 1,6 ± 0,4   | 1,6 ± 0,4    | 1,4 ± 0,1  | 0,966 | 0,545 | 0,602 |
| 38:7             | 0,4 ± 0,1   | 0,5 ± 0,1    | 0,3 ± 0,0  | 0,528 | 0,445 | 0,269 |
| <b>TG (18:2)</b> |             |              |            |       |       |       |
| 30:0             | 0,9 ± 0,3   | 0,8 ± 0,2    | 0,7 ± 0,1  | 0,819 | 0,591 | 0,711 |
| 30:1             | 0,5 ± 0,1   | 0,5 ± 0,1    | 0,4 ± 0,1  | 0,67  | 0,414 | 0,597 |
| 32:0             | 4,4 ± 1,5   | 3,4 ± 1,0    | 2,5 ± 0,4  | 0,567 | 0,185 | 0,409 |
| 32:1             | 5,4 ± 1,2   | 3,0 ± 0,7    | 2,1 ± 0,4  | 0,133 | 0,024 | 0,265 |
| 32:2             | 1,2 ± 0,2   | 0,7 ± 0,2    | 0,4 ± 0,0  | 0,093 | 0,006 | 0,117 |
| 33:0             | 0,3 ± 0,0   | 0,6 ± 0,2    | 0,4 ± 0,1  | 0,148 | 0,167 | 0,465 |
| 33:1             | 0,6 ± 0,1   | 1,0 ± 0,2    | 0,6 ± 0,1  | 0,3   | 0,683 | 0,246 |
| 34:0             | 3,4 ± 0,9   | 3,7 ± 1,1    | 2,7 ± 0,4  | 0,864 | 0,446 | 0,421 |
| 34:1             | 26,7 ± 5,7  | 17,7 ± 4,7   | 13,7 ± 2,0 | 0,256 | 0,05  | 0,458 |
| 34:2             | 18,5 ± 4,7  | 5,3 ± 1,3    | 4,1 ± 0,6  | 0,02  | 0,011 | 0,448 |
| 34:3             | 3,1 ± 0,8   | 0,7 ± 0,2    | 0,5 ± 0,1  | 0,016 | 0,023 | 0,466 |
| 35:1             | 0,5 ± 0,1   | 1,0 ± 0,3    | 0,7 ± 0,1  | 0,217 | 0,31  | 0,378 |
| 35:2             | 0,5 ± 0,1   | 0,6 ± 0,1    | 0,4 ± 0,1  | 0,689 | 0,489 | 0,381 |

|                  |            |            |           |        |       |       |
|------------------|------------|------------|-----------|--------|-------|-------|
| 36:0             | 0,5 ± 0,1  | 0,9 ± 0,3  | 0,6 ± 0,1 | 0,191  | 0,345 | 0,333 |
| 36:1             | 4,7 ± 1,1  | 4,9 ± 1,2  | 3,5 ± 0,6 | 0,913  | 0,346 | 0,333 |
| 36:2             | 18,2 ± 3,7 | 12,5 ± 2,6 | 8,4 ± 1,3 | 0,257  | 0,028 | 0,175 |
| 36:3             | 20,8 ± 7,7 | 3,7 ± 0,8  | 2,6 ± 0,2 | 0,119  | 0,102 | 0,275 |
| 38:4             | 0,7 ± 0,2  | 0,4 ± 0,1  | 0,3 ± 0,0 | 0,078  | 0,043 | 0,573 |
| 38:5             | 0,7 ± 0,2  | 0,4 ± 0,1  | 0,3 ± 0,0 | 0,139  | 0,081 | 0,102 |
| 38:6             | 0,8 ± 0,3  | 0,4 ± 0,1  | 0,3 ± 0,0 | 0,175  | 0,023 | 0,347 |
| <b>TG (18:3)</b> |            |            |           |        |       |       |
| 32:0             | 0,7 ± 0,1  | 0,6 ± 0,1  | 0,3 ± 0,0 | 0,635  | 0,014 | 0,088 |
| 32:1             | 0,5 ± 0,1  | 0,4 ± 0,1  | 0,3 ± 0,0 | 0,823  | 0,09  | 0,127 |
| 34:0             | 0,5 ± 0,1  | 0,4 ± 0,1  | 0,3 ± 0,1 | 0,835  | 0,232 | 0,477 |
| 34:1             | 3,0 ± 0,7  | 1,9 ± 0,5  | 1,3 ± 0,2 | 0,218  | 0,032 | 0,312 |
| 34:2             | 2,3 ± 0,7  | 0,7 ± 0,2  | 0,5 ± 0,1 | 0,031  | 0,014 | 0,323 |
| 36:1             | 0,6 ± 0,1  | 0,6 ± 0,2  | 0,4 ± 0,1 | 0,888  | 0,21  | 0,212 |
| 36:2             | 2,6 ± 0,5  | 1,4 ± 0,4  | 1,0 ± 0,1 | 0,09   | 0,009 | 0,281 |
| 36:3             | 3,1 ± 1,2  | 0,4 ± 0,1  | 0,3 ± 0,0 | 0,04   | 0,06  | 0,367 |
| <b>TG (20:1)</b> |            |            |           |        |       |       |
| 34:1             | 1,1 ± 0,2  | 1,2 ± 0,3  | 1,1 ± 0,2 | 0,706  | 0,993 | 0,691 |
| 34:2             | 0,9 ± 0,2  | 0,5 ± 0,1  | 0,5 ± 0,1 | 0,115  | 0,069 | 0,944 |
| <b>TG (20:2)</b> |            |            |           |        |       |       |
| 34:1             | 1,0 ± 0,2  | 0,9 ± 0,2  | 0,7 ± 0,1 | 0,93   | 0,339 | 0,373 |
| <b>TG (20:3)</b> |            |            |           |        |       |       |
| 32:1             | 0,4 ± 0,1  | 0,3 ± 0,1  | 0,2 ± 0,0 | 0,266  | 0,04  | 0,266 |
| 34:0             | 0,3 ± 0,1  | 0,4 ± 0,1  | 0,3 ± 0,0 | 0,564  | 0,596 | 0,298 |
| 34:1             | 1,8 ± 0,4  | 2,8 ± 0,6  | 1,9 ± 0,3 | 0,246  | 0,884 | 0,23  |
| 34:2             | 1,1 ± 0,1  | 1,0 ± 0,2  | 0,9 ± 0,1 | 0,934  | 0,227 | 0,627 |
| 36:3             | 0,8 ± 0,2  | 0,7 ± 0,1  | 0,5 ± 0,1 | 0,587  | 0,214 | 0,45  |
| 36:4             | 0,3 ± 0,1  | 0,2 ± 0,1  | 0,2 ± 0,0 | 0,66   | 0,209 | 0,359 |
| <b>TG (20:4)</b> |            |            |           |        |       |       |
| 32:0             | 0,5 ± 0,2  | 0,4 ± 0,1  | 0,4 ± 0,1 | 0,706  | 0,5   | 0,684 |
| 32:1             | 0,8 ± 0,3  | 0,4 ± 0,1  | 0,3 ± 0,0 | 0,215  | 0,086 | 0,31  |
| 34:0             | 0,6 ± 0,2  | 0,7 ± 0,2  | 0,5 ± 0,0 | 0,688  | 0,608 | 0,247 |
| 34:1             | 4,2 ± 1,3  | 3,0 ± 0,7  | 2,2 ± 0,3 | 0,432  | 0,143 | 0,34  |
| 34:2             | 2,6 ± 0,9  | 1,2 ± 0,3  | 1,0 ± 0,1 | 0,127  | 0,07  | 0,448 |
| 34:3             | 0,5 ± 0,1  | 0,2 ± 0,0  | 0,2 ± 0,0 | 0,052  | 0,015 | 0,227 |
| 36:2             | 2,7 ± 0,5  | 2,4 ± 0,5  | 2,1 ± 0,2 | 0,656  | 0,244 | 0,583 |
| 36:3             | 1,7 ± 0,5  | 0,9 ± 0,2  | 0,7 ± 0,1 | 0,125  | 0,049 | 0,293 |
| 36:4             | 1,0 ± 0,4  | 0,3 ± 0,1  | 0,2 ± 0,1 | 0,0687 | 0,197 | 0,535 |
| <b>TG (20:5)</b> |            |            |           |        |       |       |
| 34:1             | 0,6 ± 0,1  | 0,6 ± 0,1  | 0,5 ± 0,1 | 0,763  | 0,433 | 0,461 |
| 34:2             | 0,4 ± 0,1  | 0,3 ± 0,0  | 0,3 ± 0,1 | 0,353  | 0,171 | 0,322 |
| 36:2             | 0,4 ± 0,0  | 0,6 ± 0,1  | 0,5 ± 0,1 | 0,181  | 0,53  | 0,32  |
| 36:3             | 0,3 ± 0,0  | 0,2 ± 0,1  | 0,2 ± 0,1 | 0,241  | 0,133 | 0,763 |
| <b>TG (22:5)</b> |            |            |           |        |       |       |
| 34:1             | 1,5 ± 0,4  | 1,2 ± 0,3  | 1,0 ± 0,1 | 0,578  | 0,221 | 0,539 |
| 34:2             | 0,8 ± 0,2  | 0,5 ± 0,1  | 0,4 ± 0,1 | 0,149  | 0,077 | 0,844 |
| <b>TG (22:6)</b> |            |            |           |        |       |       |
| 32:0             | 0,6 ± 0,2  | 0,8 ± 0,2  | 0,7 ± 0,1 | 0,585  | 0,611 | 0,639 |



|      |           |           |           |       |       |       |
|------|-----------|-----------|-----------|-------|-------|-------|
| 32:1 | 0,9 ± 0,2 | 0,8 ± 0,2 | 0,6 ± 0,1 | 0,849 | 0,311 | 0,346 |
| 34:1 | 4,3 ± 1,2 | 6,1 ± 1,5 | 5,2 ± 0,5 | 0,381 | 0,461 | 0,573 |
| 34:2 | 2,4 ± 0,8 | 1,9 ± 0,4 | 1,8 ± 0,1 | 0,599 | 0,413 | 0,761 |
| 34:3 | 0,4 ± 0,1 | 0,3 ± 0,1 | 0,2 ± 0,0 | 0,385 | 0,3   | 0,684 |

## ABS – Triacylglycerols

| Metabolite       | SCD          | HFD         | HFD + Ator  | p: SCD :<br>HFD | p: SCD :<br>HFD + Ator | p: HFD :<br>HFD + Ator |
|------------------|--------------|-------------|-------------|-----------------|------------------------|------------------------|
| <b>TG (14:0)</b> |              |             |             |                 |                        |                        |
| 34:1             | 1,6 ± 0,1    | 3,3 ± 1,3   | 2,0 ± 0,3   | 0,402           | 0,452                  | 0,257                  |
| 34:2             | 1,4 ± 0,2    | 1,2 ± 0,4   | 0,8 ± 0,1   | 0,636           | 0,036                  | 0,35                   |
| 36:1             | 0,9 ± 0,1    | 3,2 ± 1,0   | 2,7 ± 0,2   | 0,064           | <0,001                 | 0,582                  |
| 36:2             | 3,0 ± 0,8    | 3,5 ± 1,2   | 2,6 ± 0,4   | 0,713           | 0,674                  | 0,444                  |
| 36:3             | 2,6 ± 0,6    | 1,3 ± 0,4   | 0,8 ± 0,1   | 0,141           | 0,017                  | 0,217                  |
| 36:4             | 1,3 ± 0,2 a  | 0,5 ± 0,2   | 0,2 ± 0,0   | 0,059           | 0,007                  | 0,172                  |
| <b>TG (16:0)</b> |              |             |             |                 |                        |                        |
| 32:1             | 4,2 ± 0,4    | 9,2 ± 2,3   | 4,6 ± 0,6   | 0,163           | 0,633                  | 0,048                  |
| 32:2             | 2,3 ± 0,6    | 1,9 ± 0,6   | 1,3 ± 0,2   | 0,673           | 0,126                  | 0,298                  |
| 32:3             | 0,3 ± 0,1    | 0,4 ± 0,1   | 0,2 ± 0,1   | 0,9             | 0,423                  | 0,482                  |
| 34:1             | 16,7 ± 1,9   | 26,7 ± 9,9  | 19,9 ± 3,3  | 0,438           | 0,524                  | 0,495                  |
| 34:2             | 27,1 ± 5,0   | 17,2 ± 6,3  | 11,5 ± 1,5  | 0,266           | 0,013                  | 0,355                  |
| 34:3             | 8,1 ± 1,9    | 3,2 ± 1,0   | 2,0 ± 0,2   | 0,062           | 0,008                  | 0,258                  |
| 34:4             | 0,9 ± 0,2    | 0,3 ± 0,1   | 0,2 ± 0,0   | 0,052           | 0,019                  | 0,327                  |
| 35:2             | 1,1 ± 0,3    | 2,5 ± 1,0   | 1,8 ± 0,2   | 0,22            | 0,073                  | 0,488                  |
| 35:3             | 0,5 ± 0,1    | 0,6 ± 0,2   | 0,4 ± 0,0   | 0,61            | 0,48                   | 0,299                  |
| 36:2             | 51,5 ± 12,3  | 64,9 ± 23,2 | 47,0 ± 5,0  | 0,628           | 0,723                  | 0,424                  |
| 36:3             | 52,1 ± 9,2   | 24,6 ± 6,8  | 16,5 ± 2,2  | 0,053           | 0,004                  | 0,249                  |
| 36:4             | 28,1 ± 3,9 a | 4,7 ± 1,2   | 2,9 ± 0,4   | 0,001           | <0,001                 | 0,14                   |
| 36:5             | 5,6 ± 0,7 a  | 0,7 ± 0,1   | 0,4 ± 0,1   | <0,001          | <0,001                 | 0,073                  |
| 37:3             | 0,4 ± 0,1    | 0,2 ± 0,0 a | 0,2 ± 0,0   | 0,545           | 0,048                  | 0,566                  |
| 38:2             | 0,9 ± 0,2    | 1,0 ± 0,4   | 0,8 ± 0,1   | 0,79            | 0,783                  | 0,612                  |
| 38:3             | 1,4 ± 0,4    | 0,9 ± 0,4   | 0,7 ± 0,1   | 0,458           | 0,091                  | 0,532                  |
| 38:4             | 2,1 ± 0,6    | 0,7 ± 0,1   | 1,0 ± 0,1   | 0,112           | 0,08                   | 0,286                  |
| 38:5             | 2,8 ± 0,6    | 1,1 ± 0,3   | 0,7 ± 0,1   | 0,057           | 0,009                  | 0,238                  |
| 38:6             | 2,0 ± 0,4    | 0,7 ± 0,1   | 0,5 ± 0,1   | 0,024           | 0,006                  | 0,219                  |
| 40:6             | 1,4 ± 0,3    | 0,8 ± 0,2   | 0,6 ± 0,1   | 0,161           | 0,021                  | 0,269                  |
| 40:7             | 2,5 ± 0,5    | 1,3 ± 0,3   | 0,9 ± 0,1 a | 0,096           | 0,022                  | 0,177                  |
| 40:8             | 1,3 ± 0,2 a  | 0,3 ± 0,1   | 0,2 ± 0,0 a | 0,003           | 0,005                  | 0,163                  |
| <b>TG (16:1)</b> |              |             |             |                 |                        |                        |
| 34:0             | 1,5 ± 0,3    | 2,0 ± 0,8   | 1,4 ± 0,1   | 0,626           | 0,75                   | 0,437                  |
| 34:1             | 11,3 ± 2,8   | 10,7 ± 4,2  | 7,4 ± 1,0   | 0,91            | 0,199                  | 0,423                  |
| 34:2             | 10,3 ± 2,8   | 4,7 ± 1,7   | 3,1 ± 0,3   | 0,143           | 0,023                  | 0,324                  |
| 34:3             | 2,3 ± 0,7    | 0,7 ± 0,2   | 0,4 ± 0,0   | 0,06            | 0,02                   | 0,133                  |
| 36:1             | 2,3 ± 0,8    | 3,0 ± 1,1   | 2,3 ± 0,3   | 0,657           | 0,928                  | 0,507                  |
| 36:2             | 15,2 ± 5,3   | 6,8 ± 0,8   | 8,5 ± 0,7   | 0,243           | 0,202                  | 0,168                  |
| 36:3             | 11,1 ± 3,0   | 3,5 ± 1,0   | 2,6 ± 0,2   | 0,052           | 0,015                  | 0,33                   |
| 36:4             | 3,9 ± 0,8 a  | 0,7 ± 0,2   | 0,5 ± 0,1   | 0,007           | 0,002                  | 0,23                   |
| 38:3             | 0,5 ± 0,1    | 0,3 ± 0,1   | 0,2 ± 0,0 b | 0,387           | 0,061                  | 0,191                  |
| 38:4             | 0,7 ± 0,3    | 0,2 ± 0,0   | 0,2 ± 0,0 a | 0,185           | 0,084                  | 0,83                   |
| 38:5             | 1,0 ± 0,2    | 0,3 ± 0,1   | 0,2 ± 0,0   | 0,054           | 0,017                  | 0,662                  |

|                  |              |              |             |       |        |       |
|------------------|--------------|--------------|-------------|-------|--------|-------|
| <b>TG (17:0)</b> |              |              |             |       |        |       |
| 34:2             | 0,5 ± 0,1    | 1,1 ± 0,4    | 0,6 ± 0,1   | 0,232 | 0,503  | 0,249 |
| 36:3             | 0,7 ± 0,2    | 1,0 ± 0,3    | 0,8 ± 0,1   | 0,347 | 0,646  | 0,369 |
| 36:4             | 0,6 ± 0,1 a  | 0,3 ± 0,1    | 0,2 ± 0,0   | 0,077 | 0,001  | 0,313 |
| <b>TG (17:1)</b> |              |              |             |       |        |       |
| 34:1             | 0,7 ± 0,1    | 2,3 ± 1,1    | 1,6 ± 0,2   | 0,284 | 0,026  | 0,473 |
| 34:2             | 0,6 ± 0,2    | 0,9 ± 0,3    | 0,6 ± 0,1   | 0,572 | 0,834  | 0,371 |
| 36:3             | 0,4 ± 0,0    | 0,5 ± 0,2    | 0,4 ± 0,0   | 0,431 | 0,914  | 0,307 |
| <b>TG (18:0)</b> |              |              |             |       |        |       |
| 32:2             | 0,4 ± 0,1    | 0,9 ± 0,3    | 0,5 ± 0,0   | 0,168 | 0,122  | 0,229 |
| 34:2             | 3,3 ± 0,1    | 5,0 ± 1,6    | 2,9 ± 0,3   | 0,423 | 0,397  | 0,197 |
| 34:3             | 1,1 ± 0,2    | 0,9 ± 0,3    | 0,6 ± 0,0   | 0,595 | 0,067  | 0,321 |
| 36:3             | 8,2 ± 2,0    | 4,8 ± 1,2    | 3,5 ± 0,2   | 0,192 | 0,03   | 0,247 |
| 36:4             | 7,3 ± 1,4 a  | 1,2 ± 0,3    | 0,8 ± 0,1   | 0,005 | 0,001  | 0,192 |
| 38:6             | 0,5 ± 0,1 a  | 0,3 ± 0,0    | 0,3 ± 0,0   | 0,054 | 0,019  | 0,5   |
| <b>TG (18:1)</b> |              |              |             |       |        |       |
| 30:0             | 2,5 ± 0,0    | 3,8 ± 1,1    | 3,0 ± 0,4   | 0,461 | 0,509  | 0,461 |
| 30:1             | 1,5 ± 0,1    | 2,4 ± 0,9    | 1,5 ± 0,2   | 0,403 | 0,775  | 0,314 |
| 32:0             | 7,5 ± 1,4    | 15,6 ± 5,6   | 11,4 ± 1,8  | 0,206 | 0,151  | 0,447 |
| 32:1             | 15,1 ± 4,0   | 16,4 ± 6,5   | 11,9 ± 1,5  | 0,877 | 0,429  | 0,474 |
| 32:2             | 4,9 ± 1,2    | 3,2 ± 1,1    | 2,3 ± 0,2   | 0,338 | 0,053  | 0,369 |
| 32:3             | 0,5 ± 0,1 a  | 0,3 ± 0,0    | 0,3 ± 0,0   | 0,082 | 0,039  | 0,952 |
| 33:2             | 0,8 ± 0,2    | 0,7 ± 0,1    | 0,8 ± 0,1   | 0,732 | 0,919  | 0,285 |
| 34:1             | 82,1 ± 22,8  | 108,6 ± 39,4 | 84,2 ± 10,8 | 0,582 | 0,931  | 0,528 |
| 34:2             | 71,2 ± 17,2  | 37,6 ± 11,6  | 28,0 ± 3,2  | 0,158 | 0,028  | 0,403 |
| 34:3             | 14,4 ± 3,6   | 5,5 ± 1,5    | 3,7 ± 0,4   | 0,065 | 0,013  | 0,248 |
| 34:4             | 1,6 ± 0,3 a  | 0,6 ± 0,2    | 0,4 ± 0,0   | 0,042 | 0,004  | 0,113 |
| 35:2             | 2,2 ± 0,7    | 3,4 ± 1,2    | 2,9 ± 0,1   | 0,459 | 0,261  | 0,715 |
| 35:3             | 0,7 ± 0,2    | 0,7 ± 0,2    | 0,5 ± 0,0   | 0,85  | 0,231  | 0,444 |
| 36:3             | 74,8 ± 22,6  | 16,0 ± 0,0   | 16,4 ± 1,7  | 0,157 | 0,042  | 0,86  |
| 36:4             | 39,4 ± 8,4 a | 5,2 ± 1,2    | 3,3 ± 0,2   | 0,019 | 0,005  | 0,117 |
| 36:5             | 8,7 ± 1,8 a  | 0,9 ± 0,2    | 0,6 ± 0,1   | 0,004 | 0,001  | 0,203 |
| 38:5             | 5,0 ± 1,8    | 1,6 ± 0,3    | 1,2 ± 0,1   | 0,113 | 0,048  | 0,244 |
| 38:6             | 3,9 ± 0,9    | 1,5 ± 0,3    | 1,2 ± 0,2   | 0,05  | 0,015  | 0,333 |
| 38:7             | 0,9 ± 0,2 a  | 0,4 ± 0,1    | 0,4 ± 0,0   | 0,025 | 0,054  | 0,709 |
| <b>TG (18:2)</b> |              |              |             |       |        |       |
| 30:0             | 1,2 ± 0,2    | 1,0 ± 0,3    | 0,6 ± 0,0   | 0,625 | 0,007  | 0,151 |
| 30:1             | 0,7 ± 0,1    | 0,4 ± 0,1    | 0,3 ± 0,0   | 0,157 | 0,022  | 0,2   |
| 32:0             | 8,7 ± 1,6    | 4,0 ± 1,1    | 2,5 ± 0,3   | 0,047 | 0,003  | 0,179 |
| 32:1             | 7,7 ± 1,6    | 3,2 ± 1,0    | 2,2 ± 0,2   | 0,05  | 0,005  | 0,269 |
| 32:2             | 2,9 ± 0,5 a  | 0,6 ± 0,2    | 0,4 ± 0,0   | 0,006 | 0,003  | 0,326 |
| 33:0             | 0,5 ± 0,1    | 0,7 ± 0,3    | 0,4 ± 0,1   | 0,422 | 0,89   | 0,329 |
| 33:1             | 0,9 ± 0,2    | 1,0 ± 0,3    | 0,7 ± 0,1   | 0,941 | 0,203  | 0,437 |
| 34:0             | 6,9 ± 1,2    | 4,5 ± 1,3    | 3,1 ± 0,3   | 0,234 | 0,013  | 0,285 |
| 34:1             | 46,1 ± 7,9   | 22,2 ± 6,5   | 15,2 ± 1,9  | 0,057 | 0,004  | 0,287 |
| 34:2             | 47,9 ± 8,3 a | 6,8 ± 1,5    | 4,6 ± 0,7   | 0,003 | <0,001 | 0,191 |
| 34:3             | 8,9 ± 1,5 a  | 1,0 ± 0,3    | 0,6 ± 0,1   | 0,002 | <0,001 | 0,191 |
| 35:1             | 0,9 ± 0,2    | 1,0 ± 0,2    | 0,8 ± 0,1   | 0,803 | 0,55   | 0,447 |
| 35:2             | 1,2 ± 0,3    | 0,6 ± 0,1    | 0,5 ± 0,1   | 0,153 | 0,059  | 0,568 |
| 36:0             | 1,1 ± 0,3    | 1,0 ± 0,3    | 0,7 ± 0,1   | 0,836 | 0,127  | 0,232 |
| 36:1             | 10,6 ± 2,7   | 5,1 ± 1,3    | 3,6 ± 0,4   | 0,117 | 0,024  | 0,256 |

|                  |               |            |             |       |        |       |
|------------------|---------------|------------|-------------|-------|--------|-------|
| 36:2             | 45,0 ± 12,0   | 11,1 ± 2,8 | 8,4 ± 0,8   | 0,065 | 0,023  | 0,337 |
| 36:3             | 54,4 ± 10,8 a | 3,8 ± 0,6  | 2,6 ± 0,2   | 0,011 | 0,003  | 0,089 |
| 38:4             | 2,1 ± 0,6     | 0,4 ± 0,1  | 0,3 ± 0,0   | 0,033 | 0,014  | 0,385 |
| 38:5             | 2,7 ± 0,5 a   | 0,4 ± 0,1  | 0,3 ± 0,0   | 0,006 | 0,002  | 0,088 |
| 38:6             | 2,5 ± 0,5 a   | 0,3 ± 0,1  | 0,2 ± 0,0 a | 0,004 | 0,003  | 0,275 |
| <b>TG (18:3)</b> |               |            |             |       |        |       |
| 32:0             | 1,2 ± 0,2     | 0,6 ± 0,2  | 0,4 ± 0,0 a | 0,038 | <0,001 | 0,276 |
| 32:1             | 0,9 ± 0,2     | 0,5 ± 0,1  | 0,3 ± 0,0   | 0,069 | 0,011  | 0,111 |
| 34:0             | 1,0 ± 0,2 a   | 0,6 ± 0,2  | 0,4 ± 0,1   | 0,135 | 0,006  | 0,262 |
| 34:1             | 6,8 ± 1,0 a   | 2,9 ± 0,8  | 1,8 ± 0,2   | 0,022 | <0,001 | 0,161 |
| 34:2             | 6,9 ± 1,0 b   | 1,0 ± 0,3  | 0,6 ± 0,1   | 0,001 | <0,001 | 0,203 |
| 36:1             | 1,6 ± 0,4 a   | 0,7 ± 0,2  | 0,6 ± 0,1   | 0,056 | 0,028  | 0,522 |
| 36:2             | 7,1 ± 1,6 a   | 1,6 ± 0,4  | 1,0 ± 0,1   | 0,017 | 0,004  | 0,183 |
| 36:3             | 8,4 ± 1,6 a   | 0,5 ± 0,1  | 0,3 ± 0,1   | 0,003 | <0,001 | 0,135 |
| <b>TG (20:1)</b> |               |            |             |       |        |       |
| 34:1             | 0,7 ± 0,2     | 1,1 ± 0,5  | 0,8 ± 0,1   | 0,541 | 0,83   | 0,546 |
| 34:2             | 0,9 ± 0,2     | 0,5 ± 0,2  | 0,3 ± 0,0   | 0,165 | 0,024  | 0,241 |
| <b>TG (20:2)</b> |               |            |             |       |        |       |
| 34:1             | 0,8 ± 0,2     | 0,3 ± 0,0  | 0,5 ± 0,1   | 0,14  | 0,193  | 0,101 |
| <b>TG (20:3)</b> |               |            |             |       |        |       |
| 32:1             | 0,5 ± 0,0     | 0,3 ± 0,1  | 0,2 ± 0,0   | 0,273 | 0,008  | 0,732 |
| 34:0             | 0,3 ± 0,1     | 0,4 ± 0,1  | 0,3 ± 0,0   | 0,797 | 0,814  | 0,585 |
| 34:1             | 2,5 ± 0,8     | 2,2 ± 0,9  | 1,7 ± 0,2   | 0,264 | 0,368  | 0,09  |
| 34:2             | 2,0 ± 0,6     | 1,0 ± 0,3  | 0,6 ± 0,0   | 0,102 | 0,033  | 0,873 |
| 36:3             | 2,0 ± 0,7     | 0,6 ± 0,1  | 0,4 ± 0,0   | 0,068 | 0,025  | 0,138 |
| 36:4             | 0,8 ± 0,2 a   | 0,2 ± 0,0  | 0,2 ± 0,0   | 0,035 | 0,078  | 0,324 |
| <b>TG (20:4)</b> |               |            |             |       |        |       |
| 32:0             | 0,8 ± 0,1     | 0,5 ± 0,1  | 0,4 ± 0,0   | 0,048 | 0,006  | 0,357 |
| 32:1             | 0,9 ± 0,2     | 0,4 ± 0,1  | 0,3 ± 0,0   | 0,09  | 0,018  | 0,511 |
| 34:0             | 0,9 ± 0,2     | 0,6 ± 0,1  | 0,5 ± 0,1   | 0,39  | 0,12   | 0,384 |
| 34:1             | 6,5 ± 1,5     | 2,7 ± 0,6  | 2,0 ± 0,2   | 0,056 | 0,012  | 0,294 |
| 34:2             | 6,2 ± 1,3     | 1,1 ± 0,2  | 0,8 ± 0,1   | 0,009 | 0,003  | 0,273 |
| 34:3             | 1,2 ± 0,2 a   | 0,2 ± 0,0  | 0,2 ± 0,0   | 0,01  | 0,01   | 0,674 |
| 36:2             | 7,3 ± 2,2     | 1,8 ± 0,2  | 1,5 ± 0,2   | 0,05  | 0,022  | 0,3   |
| 36:3             | 6,2 ± 1,6 a   | 0,7 ± 0,1  | 0,6 ± 0,1   | 0,015 | 0,006  | 0,19  |
| 36:4             | 3,3 ± 0,7     | 0,3 ± 0,1  | 0,2 ± 0,0   | 0,006 | 0,006  | 0,117 |
| <b>TG (20:5)</b> |               |            |             |       |        |       |
| 34:1             | 1,3 ± 0,2 a   | 1,0 ± 0,2  | 0,6 ± 0,1   | 0,331 | 0,013  | 0,059 |
| 34:2             | 1,1 ± 0,1 b   | 0,5 ± 0,1  | 0,3 ± 0,0   | 0,007 | 0,002  | 0,112 |
| 36:2             | 1,3 ± 0,4 a   | 0,6 ± 0,1  | 0,4 ± 0,0   | 0,111 | 0,043  | 0,104 |
| 36:3             | 1,1 ± 0,2 b   | 0,3 ± 0,0  | 0,2 ± 0,0   | 0,009 | 0,002  | 0,039 |
| <b>TG (22:5)</b> |               |            |             |       |        |       |
| 34:1             | 2,3 ± 0,6     | 1,3 ± 0,3  | 0,8 ± 0,1   | 0,186 | 0,033  | 0,166 |
| 34:2             | 1,5 ± 0,4     | 0,4 ± 0,1  | 0,3 ± 0,0   | 0,032 | 0,008  | 0,172 |
| <b>TG (22:6)</b> |               |            |             |       |        |       |
| 32:0             | 1,1 ± 0,2     | 0,8 ± 0,1  | 0,6 ± 0,2   | 0,262 | 0,088  | 0,404 |
| 32:1             | 1,3 ± 0,3     | 0,6 ± 0,1  | 0,5 ± 0,1   | 0,06  | 0,016  | 0,458 |
| 34:1             | 8,4 ± 1,7     | 5,1 ± 1,0  | 3,5 ± 0,2 a | 0,15  | 0,033  | 0,188 |
| 34:2             | 7,5 ± 1,3 a   | 1,9 ± 0,4  | 1,0 ± 0,0 a | 0,005 | 0,002  | 0,061 |

|      |             |           |           |       |        |       |
|------|-------------|-----------|-----------|-------|--------|-------|
| 34:3 | 1,3 ± 0,2 b | 0,3 ± 0,1 | 0,2 ± 0,0 | 0,002 | <0,001 | 0,472 |
|------|-------------|-----------|-----------|-------|--------|-------|

### CONV – Glycosylceramide

| Metabolite    | SCD       | HFD       | HFD + Ator | p: SCD :<br>HFD | p: SCD :<br>HFD + Ator | p: HFD :<br>HFD + Ator |
|---------------|-----------|-----------|------------|-----------------|------------------------|------------------------|
| <b>HexCer</b> |           |           |            |                 |                        |                        |
| (d18:1/16:0)  | 1,0 ± 0,1 | 1,4 ± 0,1 | 1,2 ± 0,1  | 0,041           | 0,076                  | 0,297                  |
| (d18:1/18:0)  | 0,3 ± 0,0 | 0,7 ± 0,1 | 0,5 ± 0,1  | 0,003           | 0,074                  | 0,177                  |
| (d18:1/18:1)  | 0,0 ± 0,0 | 0,1 ± 0,0 | 0,1 ± 0,0  | 0,002           | 0,022                  | 0,023                  |
| (d18:1/20:0)  | 0,2 ± 0,0 | 0,5 ± 0,1 | 0,4 ± 0,1  | 0,002           | 0,081                  | 0,069                  |
| (d18:1/22:0)  | 2,0 ± 0,0 | 3,0 ± 0,3 | 2,5 ± 0,3  | 0,046           | 0,223                  | 0,24                   |
| (d18:1/23:0)  | 0,7 ± 0,1 | 1,8 ± 0,2 | 1,3 ± 0,1  | <0,001          | 0,012                  | 0,025                  |
| (d18:1/24:0)  | 0,5 ± 0,0 | 0,7 ± 0,1 | 0,6 ± 0,0  | 0,017           | 0,101                  | 0,15                   |
| (d18:1/24:1)  | 3,2 ± 0,2 | 3,4 ± 0,3 | 2,9 ± 0,2  | 0,558           | 0,333                  | 0,187                  |

### ABS – Glycosylceramide

| Metabolite    | SCD         | HFD         | HFD + Ator  | p: SCD :<br>HFD | p: SCD :<br>HFD + Ator | p: HFD :<br>HFD + Ator |
|---------------|-------------|-------------|-------------|-----------------|------------------------|------------------------|
| <b>HexCer</b> |             |             |             |                 |                        |                        |
| (d18:1/16:0)  | 0,5 ± 0,1 b | 0,8 ± 0,0 b | 0,8 ± 0,0 b | 0,034           | 0,031                  | 0,737                  |
| (d18:1/18:0)  | 0,2 ± 0,0 a | 0,4 ± 0,0 a | 0,3 ± 0,0   | 0,002           | 0,011                  | 0,11                   |
| (d18:1/18:1)  | 0,0 ± 0,0 a | 0,1 ± 0,0   | 0,0 ± 0,0   | 0,048           | 0,55                   | 0,147                  |
| (d18:1/20:0)  | 0,2 ± 0,0   | 0,4 ± 0,0 a | 0,3 ± 0,0   | 0,063           | 0,096                  | 0,348                  |
| (d18:1/22:0)  | 1,2 ± 0,2 b | 1,9 ± 0,2 a | 1,6 ± 0,1 a | 0,025           | 0,056                  | 0,154                  |
| (d18:1/23:0)  | 0,6 ± 0,1   | 1,0 ± 0,0 b | 0,9 ± 0,0 a | 0,011           | 0,01                   | 0,5                    |
| (d18:1/24:0)  | 0,4 ± 0,1   | 0,5 ± 0,0 a | 0,4 ± 0,0 a | 0,174           | 0,391                  | 0,324                  |
| (d18:1/24:1)  | 2,2 ± 0,4   | 2,0 ± 0,1 b | 1,7 ± 0,1 b | 0,549           | 0,17                   | 0,1                    |

### Supplemental Table S3

Table summarizes the effect of atorvastatin on selected lipids including glycerophospholipids, triacylglycerols and glycosylceramide in conventionally raised (CONV) and abiotic mice (ABS). Significantly increased values in ABS mice as compared to the respective group in CONV mice are highlighted in green and the significantly decreased values are highlighted in red, respectively. The letters a,b and c indicate the degree of significance: with a = p<0.05; b = p<0.01; and c = p<0.001.

## References

1. Lee, D.H.; Zo, Y.G.; Kim, S.J. Nonradioactive method to study genetic profiles of natural bacterial communities by PCR-single-strand-conformation polymorphism. *Appl. Environ. Microbiol.* **1996**, *62*, 3112–3120, doi:10.1128/aem.62.9.3112-3120.1996.
2. Van Dyke, M.I.; McCarthy, A.J. Molecular Biological Detection and Characterization of Clostridium Populations in Municipal Landfill Sites. *Appl. Environ. Microbiol.* **2002**, *68*, 2049–2053, doi:10.1128/aem.68.4.2049-2053.2002.
3. Matsuki, T.; Watanabe, K.; Fujimoto, J.; Miyamoto, Y.; Takada, T.; Matsumoto, K.; Oyaizu, H.; Tanaka, R. Development of 16S rRNA-Gene-Targeted Group-Specific Primers for the Detection and Identification of Predominant Bacteria in Human Feces. *Appl. Environ. Microbiol.* **2002**, *68*, 5445–5451, doi:10.1128/aem.68.11.5445-5451.2002.
4. Bartosch, S.; Fite, A.; Macfarlane, G.T.; McMurdo, M.E.T. Characterization of Bacterial Communities in Feces from Healthy Elderly Volunteers and Hospitalized Elderly Patients by Using Real-Time PCR and Effects of Antibiotic Treatment on the Fecal Microbiota. *Appl. Environ. Microbiol.* **2004**, *70*, 3575–3581, doi:10.1128/aem.70.6.3575-3581.2004.
5. Kühbacher, T.; Ott, S.J.; Helwig, U.; Mimura, T.; Rizzello, F.; Kleessen, B.; Gionchetti, P.; Blaut, M.; Campieri, M.; Fölsch, U.R.; et al. Bacterial and fungal microbiota in relation to probiotic therapy (VSL#3) in pouchitis. *Gut* **2006**, *55*, 833–841, doi:10.1136/gut.2005.078303.
6. Heilig, H.G.; Zoetendal, E.G.; Vaughan, E.E.; Marteau, P.; Akkermans, A.D.; De Vos, W.M. Molecular Diversity of Lactobacillus spp. and Other Lactic Acid Bacteria in the Human Intestine as Determined by Specific Amplification of 16S Ribosomal DNA. *Appl. Environ. Microbiol.* **2002**, *68*, 114–123, doi:10.1128/aem.68.1.114-123.2002.
7. Walter, J.; Hertel, C.; Tannock, G.W.; Lis, C.M.; Munro, K.; Hammes, W.P. Detection of Lactobacillus, Pediococcus, Leuconostoc, and Weissella Species in Human Feces by Using Group-Specific PCR Primers and Denaturing Gradient Gel Electrophoresis. *Appl. Environ. Microbiol.* **2001**, *67*, 2578–2585, doi:10.1128/AEM.67.6.2578-2585.2001.
8. Rinttilä, T.; Kassinen, A.; Malinen, E.; Krogius, L.; Palva, A. Development of an extensive set of 16S rDNA-targeted primers for quantification of pathogenic and indigenous bacteria in faecal samples by real-time PCR. *J. Appl. Microbiol.* **2004**, *97*, 1166–1177, doi:10.1111/j.1365-2672.2004.02409.x.
9. Barman, M.; Unold, D.; Shifley, K.; Amir, E.; Hung, K.; Bos, N.; Salzman, N. Enteric Salmonellosis Disrupts the Microbial Ecology of the Murine Gastrointestinal Tract. *Infect. Immun.* **2007**, *76*, 907–915, doi:10.1128/iai.01432-07.
10. Wise, M.; Siragusa, G.R. Quantitative analysis of the intestinal bacterial community in one- to three-week-old commercially reared broiler chickens fed conventional or antibiotic-free vegetable-based diets. *J. Appl. Microbiol.* **2006**, *102*, 1138–1149, doi:10.1111/j.1365-2672.2006.03153.x.
